# Supplementary material for: Evolution of body morphology and beak shape revealed by a morphometric analysis of 14 Paridae species
Source: PubMed Central journal article supplement (PMC4928266; doi:10.1186/s12983-016-0162-0), 2016-06-29
Supplement: 12983_2016_162_MOESM1_ESM.pdf [file 12983_2016_162_MOESM1_ESM.pdf]

**Additional File 1. Supplementary materials.**

**Table S1. List of Paridae species in this study.**

**Table S2. Methods for the linear morphological measurements.**

**Table S3. List of sequences and GenBank accession numbers used in the phylogenetic reconstruction.**

**Table S4. Summary statistics for body morphology of Paridae species examined.**

**Table S5 Mahalanobis distances for body morphology among species.**

**Table S6. Results of the PCA of body morphology.**

**Table S7. Mahalanobis distances for beak shape among species.**

**Table S8. Phylogenetic signals for each morphological character.**

**Table S9. Covariation between morphology and altitude.**

**Table S10. Results of the Mantel test for the correlation between character divergence and distributional distances.**

**Figure S1. Box plots of body characters of the 14 Paridae species examined.**

**Figure S2. Results of the canonical variate analysis (CVA) on the morphology of individuals from the 14 species examined.** The CVA was able to identify axes that concentrated most of the interspecific variation. A: Plot of CV1 and CV2 for body morphology. B: Loading coefficients of CV1 and CV2. CV1 explains 77.92 % of the total variance and is interpreted as the ratio of body weight, tarsus and culmen length to tail length. CV2 explains 13.72% of the total variance and is interpreted as the wing/tail length ratio. C. Plot of CV1 and CV2 for beak shape. CV1 explains 53.07 % of the total variance and is associated with the variation from a long, slender, pointed beak to a short, blunt, robust beak. CV2 explains 15.27 % of the total variance and is associated with beak shape variation from a straight outline to a rounded outline. CV3 explains 12.92 % of the total variance and is associated with the curvature of the beak outline near the tip, as well as relative position of landmarks 1 and 2. This axis of shape variation shows the least interspecific difference.

**Table S1. List of Paridae species in this study.**

| Common name        | Scientific name                | Sample size     |            |
|--------------------|--------------------------------|-----------------|------------|
|                    |                                | Body morphology | Beak shape |
| Yellow-browed Tit  | <i>Sylviparus modestus</i>     | 7               | 7          |
| Sultan Tit         | <i>Melanochlora sultanea</i>   | 8               | 9          |
| Azure Tit          | <i>Cyanistes cyanus</i>        | 11              | 11         |
| Great Tit          | <i>Parus major</i>             | 104             | 69         |
| Green-backed Tit   | <i>Parus monticolus</i>        | 46              | 29         |
| Ground Tit         | <i>Pseudopodoces humilis</i>   | 41              | 27         |
| Yellow-cheeked Tit | <i>Parus spilonotus</i>        | 16              | 18         |
| Grey-crest Tit     | <i>Lophophanes dichrous</i>    | 6               | 8          |
| Coal Tit           | <i>Periparus ater</i>          | 11              | 11         |
| Rufous-vented Tit  | <i>Periparus rubidiventris</i> | 22              | 22         |
| Yellow-bellied Tit | <i>Periparus venustulus</i>    | 30              | 33         |
| Willow Tit         | <i>Poecile montanus</i>        | 18              | 19         |
| Marsh Tit          | <i>Poecile palustris</i>       | 49              | 38         |
| White-browed Tit   | <i>Poecile superciliosus</i>   | 7               | 5          |
| Total              |                                | 376             | 306        |

**Table S2. Methods for the linear morphological measurements.**

---

| Character     | Method                                                                                                                                   |
|---------------|------------------------------------------------------------------------------------------------------------------------------------------|
| Body weight   | Weighed in the field by collectors.                                                                                                      |
| Body length   | Measured in the field by collectors.                                                                                                     |
| Wing length   | The distance between the bend of wing to the tip of longest primary, measured on the closed wing.                                        |
| Tail length   | The distance from the root of central pairs of tail-feathers to tip of longest tail-feather, measured when the tail is naturally folded. |
| Tarsus length | The distance from the notch on the back of the inter-tarsal joint to the lower edge of the last complete scale before the toes diverge.  |
| Culmen        | The distance from the tip of the bill to the distal edge of the nostrils.                                                                |

---

**References:**

Svenson L, Identification guide to European Passerines; London; British Trust for Ornithology; 1992.

**Table S3. List of sequences and GenBank accession numbers used in the phylogenetic reconstruction.**

| Scientific name                | <i>Myo</i> | Ref | <i>ODC</i> | Ref | <i>ND2</i> | Ref | <i>cytb</i> | Ref |
|--------------------------------|------------|-----|------------|-----|------------|-----|-------------|-----|
| <i>Sylviparus modestus</i>     | KF183651   | [1] | KF183738   | [1] | KF183827   | [1] | HM185371    | [2] |
| <i>Melanochloa sultanea</i>    | KF183652   | [1] | KF183739   | [1] | KF183828   | [1] | AY308721    | [3] |
| <i>Cyanistes cyaneus</i>       | KF183656   | [1] | KF183743   | [1] | KF183832   | [1] | HM185352    | [2] |
| <i>Parus major</i>             | AY228310   | [4] | KF183747   | [1] | AY136587   | [5] | HM185345    | [2] |
| <i>Parus monticolus</i>        | KF183658   | [1] | KF183746   | [1] | KF183835   | [1] | HM185349    | [2] |
| <i>Pseudopodoces humilis</i>   | KF183657   | [1] | KF183744   | [1] | KF183833   | [1] | HM185372    | [2] |
| <i>Parus spilonotus</i>        | KF183664   | [1] | KF183752   | [1] | KF183840   | [1] | HM185351    | [2] |
| <i>Lophophanes dichrous</i>    | KF183704   | [1] | KF183792   | [1] | KF183880   | [1] | HM185367    | [2] |
| <i>Periparus ater</i>          | KF183698   | [1] | KF183786   | [1] | KF183874   | [1] | HM185355    | [2] |
| <i>Periparus rubidiventris</i> | KF183701   | [1] | KF183789   | [1] | KF183877   | [1] | AY308725    | [3] |
| <i>Periparus venustulus</i>    | KF183697   | [1] | KF183785   | [1] | KF183873   | [1] | HM185353    | [2] |
| <i>Poecile montanus</i>        | KF183721   | [1] | KF183809   | [1] | KF183897   | [1] | HM185363    | [2] |
| <i>Poecile palustris</i>       | KF183719   | [1] | KF183807   | [1] | KF183895   | [1] | HM185358    | [2] |
| <i>Poecile superciliosus</i>   | KF183714   | [1] | KF183802   | [1] | KF183890   | [1] | AF347952    | [3] |
| <i>Regulus regulus</i>         | DQ466835   | [6] | EU680761   | [7] | KF183821   | [1] | AJ004762    | [7] |

**References:**

1. Johansson US, Ekman J, Bowie RCK, Halvarsson P, Ohlson JI, Price TD et al. A complete multilocus species phylogeny of the tits and chickadees (Aves: Paridae). *Mol Phylogenet Evol.* 2013;69(3):852-60.
2. Dai CY, Chen K, Zhang RY, Yang XJ, Yin ZH, Tian HJ et al. Molecular phylogenetic analysis among species of Paridae, Remizidae and Aegithalos based on mtDNA sequences of *COI* and *cyt b*. *Chinese Birds.* 2010;1(2):112-23.
3. Gill FB, Slikas B, Sheldon FH. Phylogeny of titmice (Paridae): II. Species relationships based on sequences of the mitochondrial cytochrome-B gene. *Auk.* 2005;122(3):121-43.
4. Ericson PGP, Johansson US. Phylogeny of Passerida (Aves : Passeriformes) based on nuclear and mitochondrial sequence data. *Mol Phylogenet Evol.* 2003;29(1):126-38.
5. Sefc KM, Payne RB, Sorenson MD. Phylogenetic relationships of African sunbird-like warblers:

Moho (*Hypergerus atriceps*), Green Hylia (*Hylia prasina*) and Tit-hylia (*Pholidornis rufiae*).  
Ostrich. 2003;74(1-2):8-17.

6. Johansson US, Fjeldsa J, Bowie RCK. Phylogenetic relationships within Passerida (Aves : Passeriformes): a review and a new molecular phylogeny based on three nuclear intron markers. Mol Phylogenet Evol. 2008;48(3):858-76.
7. Zuccon D, Cibois A, Pasquet E, Ericson PGP. Nuclear and mitochondrial sequence data reveal the major lineages of starlings, mynas and related taxa. Mol Phylogenet Evol. 2006;41(2):333-44.

**Table S4. Summary statistics for body morphology of Paridae species examined.**

|                                | Sample size | Body weight/g | Body length mm | Wing length mm | Tail length mm | Tarsus length mm | Culmen length mm |
|--------------------------------|-------------|---------------|----------------|----------------|----------------|------------------|------------------|
| <i>Sylviparus modestus</i>     | 7           | 7.20±0.15     | 88.12±1.23     | 55.90±1.34     | 37.97±0.76     | 14.23±0.22       | 5.71±0.05        |
| <i>Melanochlora sultanea</i>   | 8           | 39.13±1.16    | 196.38±2.09    | 106.36±1.49    | 92.74±1.50     | 21.55±0.27       | 11.10±0.25       |
| <i>Cyanistes cyanus</i>        | 11          | 12.09±0.21    | 123.36±2.12    | 65.95±0.49     | 59.17±1.21     | 15.61±0.19       | 7.15±0.13        |
| <i>Parus major</i>             | 104         | 13.92±0.13    | 131.65±0.68    | 68.49±0.39     | 62.40±0.41     | 17.20±0.09       | 7.81±0.05        |
| <i>Parus monticolus</i>        | 46          | 13.35±0.24    | 123.09±1.25    | 66.58±0.36     | 55.04±0.46     | 17.15±0.08       | 7.56±0.06        |
| <i>Pseudopodoces humilis</i>   | 41          | 39.51±0.57    | 162.73±1.58    | 88.47±0.39     | 60.86±0.62     | 27.16±0.12       | 19.31±0.30       |
| <i>Parus spilonotus</i>        | 16          | 19.19±0.31    | 137.75±2.22    | 79.02±0.65     | 60.68±0.77     | 17.54±0.18       | 9.21±0.11        |
| <i>Lophophanes dichrous</i>    | 6           | 12.67±0.56    | 114.83±3.07    | 71.20±1.44     | 51.78±1.29     | 19.15±0.38       | 7.22±0.24        |
| <i>Periparus ater</i>          | 11          | 8.18±0.35     | 100.00±1.39    | 58.17±0.60     | 43.69±1.01     | 15.13±0.28       | 7.10±0.19        |
| <i>Periparus rubidiventris</i> | 22          | 8.91±0.25     | 103.86±1.20    | 64.78±0.55     | 46.74±0.45     | 17.17±0.13       | 7.40±0.10        |
| <i>Periparus venustulus</i>    | 30          | 11.07±0.17    | 97.17±0.75     | 63.85±0.34     | 35.01±0.42     | 14.46±0.08       | 7.47±0.06        |
| <i>Poecile montanus</i>        | 18          | 12.11±0.31    | 120.56±1.41    | 64.02±0.44     | 59.27±0.63     | 16.24±0.14       | 7.95±0.11        |
| <i>Poecile palustris</i>       | 49          | 10.59±0.16    | 118.98±1.49    | 62.55±0.40     | 55.58±0.86     | 14.50±0.09       | 7.28±0.06        |
| <i>Poecile superciliosus</i>   | 7           | 11.86±0.63    | 129.86±2.44    | 64.39±0.65     | 66.54±1.13     | 17.03±0.19       | 7.54±0.08        |
| Total                          | 376         | 15.85±0.48    | 126.54±1.09    | 69.20±0.51     | 56.54±0.53     | 17.57±0.18       | 8.90±0.19        |
| $F_{(13,376)}$                 |             | 586.972       | 203.478        | 231.813        | 153.200        | 454.908          | 670.677          |
| <i>P</i> -value                |             | < 0.0001      | < 0.0001       | < 0.0001       | < 0.0001       | < 0.0001         | < 0.0001         |

The value of each characteristic is given as mean ± SE.

**Table S5 Mahalanobis distances for body morphology among species.**

|                          | <i>Sy. modestus</i> | <i>Me. sultanea</i> | <i>Cy. cyanus</i> | <i>P. major</i> | <i>P. monticolus</i> | <i>Ps. humilis</i> | <i>P. spilonotus</i> | <i>Lo. dichrous</i> | <i>Pe. ater</i> | <i>Pe. rubidiventris</i> | <i>Pe. venustus</i> | <i>Po. montanus</i> | <i>Po. palustris</i> |
|--------------------------|---------------------|---------------------|-------------------|-----------------|----------------------|--------------------|----------------------|---------------------|-----------------|--------------------------|---------------------|---------------------|----------------------|
| <i>Me. sultanea</i>      | 412.7*              |                     |                   |                 |                      |                    |                      |                     |                 |                          |                     |                     |                      |
| <i>Cy. cyanus</i>        | 56.52*              | 198.31*             |                   |                 |                      |                    |                      |                     |                 |                          |                     |                     |                      |
| <i>P. major</i>          | 86.60*              | 149.37*             | 6.93*             |                 |                      |                    |                      |                     |                 |                          |                     |                     |                      |
| <i>P. monticolus</i>     | 64.97*              | 167.42*             | 8.61*             | 3.50*           |                      |                    |                      |                     |                 |                          |                     |                     |                      |
| <i>Ps. humilis</i>       | 630.85*             | 188.41*             | 434.68*           | 345.83*         | 343.95*              |                    |                      |                     |                 |                          |                     |                     |                      |
| <i>P. spilonotus</i>     | 141.54*             | 78.66*              | 41.16*            | 25.43*          | 25.74*               | 241.79*            |                      |                     |                 |                          |                     |                     |                      |
| <i>Lo. dichrous</i>      | 72.95*              | 176.45*             | 38.33*            | 27.66*          | 17.07*               | 348.23*            | 44.31*               |                     |                 |                          |                     |                     |                      |
| <i>Pe. ater</i>          | 15.17*              | 322.08*             | 27.03*            | 42.99*          | 29.97*               | 490.56*            | 87.93*               | 49.35*              |                 |                          |                     |                     |                      |
| <i>Pe. rubidiventris</i> | 32.78*              | 262.03*             | 31.33*            | 34.97*          | 22.35*               | 423.50*            | 68.27*               | 17.80*              | 12.69*          |                          |                     |                     |                      |
| <i>Pe. venustus</i>      | 48.49*              | 297.03*             | 74.03*            | 89.70*          | 63.35*               | 432.60*            | 78.27*               | 75.34*              | 41.98*          | 52.36*                   |                     |                     |                      |
| <i>Po. montanus</i>      | 69.02*              | 197.24*             | 5.32*             | 5.37*           | 7.81*                | 380.33*            | 40.18*               | 40.76*              | 27.20*          | 31.00*                   | 81.81*              |                     |                      |
| <i>Po. palustris</i>     | 46.97*              | 246.66*             | 5.13*             | 19.79*          | 20.09*               | 474.91*            | 58.63*               | 60.76*              | 18.62*          | 36.05*                   | 65.88*              | 9.37*               |                      |
| <i>Po. superciliosus</i> | 89.74*              | 200.75*             | 11.16*            | 7.69*           | 15.86*               | 412.23*            | 58.85*               | 46.27*              | 45.15*          | 42.90*                   | 126.41*             | 6.77*               | 20.93*               |

“\*” indicates statistical significance ( $P < 0.05$ ).  $P$ -values were processed with Bonferroni-Holm correction to minimize type I error.

**Table S6. Results of the PCA of body morphology.**

|     | Eigenvalue | %<br>variance | Loading coefficients of morphological characteristics |                |                |                |                  |                  |
|-----|------------|---------------|-------------------------------------------------------|----------------|----------------|----------------|------------------|------------------|
|     |            |               | Body<br>weight                                        | Body<br>length | Wing<br>length | Tail<br>length | Tarsus<br>length | Culmen<br>length |
| PC1 | 5.0479     | 84.13         | 0.44                                                  | 0.43           | 0.42           | 0.36           | 0.40             | 0.39             |
| PC2 | 0.6636     | 11.06         | -0.10                                                 | 0.31           | 0.03           | 0.70           | -0.39            | -0.51            |
| PC3 | 0.1632     | 2.72          | -0.34                                                 | 0.01           | -0.66          | 0.41           | 0.48             | 0.23             |



**Table S7. Mahalanobis distances for beak shape among species.**

|                          | <i>Sy. modestus</i> | <i>Me. sultanea</i> | <i>Cy. cyaneus</i> | <i>P. major</i> | <i>P. monticolus</i> | <i>Ps. humilis</i> | <i>P. spilonotus</i> | <i>Lo. dichrous</i> | <i>Pe. ater</i> | <i>Pe. rubidiventris</i> | <i>Pe. venustus</i> | <i>Po. montanus</i> | <i>Po. palustris</i> |
|--------------------------|---------------------|---------------------|--------------------|-----------------|----------------------|--------------------|----------------------|---------------------|-----------------|--------------------------|---------------------|---------------------|----------------------|
| <i>Me. sultanea</i>      | 8.20*               |                     |                    |                 |                      |                    |                      |                     |                 |                          |                     |                     |                      |
| <i>Cy. cyaneus</i>       | 5.03*               | 6.47*               |                    |                 |                      |                    |                      |                     |                 |                          |                     |                     |                      |
| <i>P. major</i>          | 4.83*               | 5.66*               | 3.86*              |                 |                      |                    |                      |                     |                 |                          |                     |                     |                      |
| <i>P. monticolus</i>     | 5.02*               | 5.70*               | 4.22*              | 1.68*           |                      |                    |                      |                     |                 |                          |                     |                     |                      |
| <i>Ps. humilis</i>       | 10.79*              | 9.91*               | 10.38*             | 8.87*           | 8.86*                |                    |                      |                     |                 |                          |                     |                     |                      |
| <i>P. spilonotus</i>     | 5.11*               | 6.04*               | 4.01*              | 1.96*           | 2.23*                | 9.33*              |                      |                     |                 |                          |                     |                     |                      |
| <i>Lo. dichrous</i>      | 5.17*               | 6.50*               | 4.96*              | 2.57*           | 2.66*                | 8.44*              | 3.64*                |                     |                 |                          |                     |                     |                      |
| <i>Pe. ater</i>          | 6.11*               | 8.29*               | 6.62*              | 4.75*           | 4.96*                | 7.86*              | 5.30*                | 4.10*               |                 |                          |                     |                     |                      |
| <i>Pe. rubidiventris</i> | 4.54*               | 7.28*               | 4.52*              | 2.82*           | 3.17*                | 8.91*              | 3.29*                | 2.79*               | 3.96*           |                          |                     |                     |                      |
| <i>Pe. venustus</i>      | 4.86*               | 7.58*               | 5.75*              | 4.09*           | 4.03*                | 9.34*              | 4.16*                | 4.25*               | 4.17*           | 4.35*                    |                     |                     |                      |
| <i>Po. montanus</i>      | 4.03*               | 7.46*               | 4.21*              | 3.05*           | 3.45*                | 9.04*              | 3.56*                | 3.23*               | 4.01*           | 2.43*                    | 4.34*               |                     |                      |
| <i>Po. palustris</i>     | 4.42*               | 7.44*               | 3.76*              | 3.37*           | 4.01*                | 10.32*             | 3.67*                | 4.01*               | 5.62*           | 3.11*                    | 5.23*               | 2.55*               |                      |
| <i>Po. superciliosus</i> | 4.28*               | 7.11*               | 2.69               | 4.01*           | 4.29*                | 10.57*             | 4.50*                | 4.75*               | 6.43*           | 4.27*                    | 5.96*               | 3.50*               | 3.40                 |

“\*” indicates statistical significance ( $P < 0.05$ ).  $P$ -values were processed with Bonferroni-Holm correction to minimize type I error.

**Table S8. Phylogenetic signals for each morphological character.**

| Character                    | 14 species |                 |           |                 | 13 species (Without <i>Ps. humilis</i> ) |                 |           |                 |
|------------------------------|------------|-----------------|-----------|-----------------|------------------------------------------|-----------------|-----------|-----------------|
|                              | K          | <i>P</i> -value | $\lambda$ | <i>P</i> -value | K                                        | <i>P</i> -value | $\lambda$ | <i>P</i> -value |
| Log10(body weight)           | 1.0915     | 0.065           | 0.9999    | 0.063           | 1.1022                                   | 0.088           | 0.9999    | 0.046*          |
| Log10(Body length)           | 1.1182     | 0.036           | 0.9999    | 0.037*          | 1.0925                                   | 0.086           | 0.9999    | 0.045*          |
| Log10(Wing length)           | 1.0423     | 0.094           | 0.9999    | 0.067           | 1.0496                                   | 0.109           | 0.9999    | 0.070           |
| Log10(Tail length)           | 0.9580     | 0.095           | 0.9999    | 0.102           | 0.9547                                   | 0.109           | 0.9999    | 0.128           |
| Log10(Tarsus length)         | 0.8754     | 0.174           | 0.0001    | 1.000           | 0.7636                                   | 0.320           | 0.0001    | 1.000           |
| Log10(Culmen length)         | 1.0133     | 0.130           | 0.9999    | 0.395           | 1.0718                                   | 0.087           | 0.9999    | 0.072           |
| Size-corrected body length   | 0.7511     | 0.333           | 0.0001    | 1.000           | 0.7602                                   | 0.327           | 0.0001    | 1.000           |
| Size-corrected wing length   | 0.9004     | 0.171           | 0.0001    | 1.000           | 0.7972                                   | 0.231           | 0.0001    | 1.000           |
| Size-corrected tail length   | 0.6799     | 0.509           | 0.0001    | 1.000           | 0.6962                                   | 0.407           | 0.0001    | 1.000           |
| Size-corrected tarsus length | 0.7372     | 0.370           | 0.0001    | 1.000           | 0.6891                                   | 0.477           | 0.0001    | 1.000           |
| Size-corrected culmen length | 1.0585     | 0.069           | 0.9999    | 0.246           | 1.2689                                   | 0.038           | 0.9999    | 0.038*          |
| PC1 of body morphology       | 1.0623     | 0.056           | 0.9999    | 0.075           | 1.0515                                   | 0.104           | 0.9999    | 0.059           |
| PC2 of body morphology       | 0.8347     | 0.196           | 0.0001    | 1.000           | 0.8851                                   | 0.153           | 0.9999    | 0.260           |
| PC1 of beak shape            | 0.8979     | 0.155           | 0.0001    | 1.000           | 0.8556                                   | 0.188           | 0.0001    | 1.000           |
| PC3 of beak shape            | 1.1044     | 0.059           | 0.9999    | 0.040*          | 1.1407                                   | 0.046           | 0.9999    | 0.044*          |

*P*-value is result for the null hypothesis of no phylogenetic signal. “\*” indicates statistical significance ( $P < 0.05$ ).

**Table S9. Covariation between morphology and altitude.**

| Character                    | PGLS of species means | Individuals within <i>P. major</i> |                 |
|------------------------------|-----------------------|------------------------------------|-----------------|
|                              | <i>P</i> -value       | <i>R</i> <sup>2</sup>              | <i>P</i> -value |
| Log10(body weight)           | 0.7637                | 0.237                              | 0.0000*         |
| Size-corrected body length   | 0.6004                | 0.039                              | 0.0452*         |
| Size-corrected wing length   | 0.2302                | 0.034                              | 0.0596          |
| Size-corrected tai length    | 0.7505                | 0.004                              | 0.5099          |
| Size-corrected tarsus length | 0.0001*               | 0.004                              | 0.5250          |
| Size-corrected culmen length | 0.0083*               | 0.044                              | 0.0330*         |
| PC1 of body morphology       | 0.4941                | 0.374                              | 0.0000*         |
| PC2 of body morphology       | 0.0803                | 0.000                              | 0.9504          |
| PC1 of beak shape            | 0.0486*               | 0.000                              | 0.5874          |
| PC3 of beak shape            | 0.0783                | 0.003                              | 0.0576          |

“\*” indicates statistical significance ( $P < 0.05$ ).

**Table S10. Results of the Mantel test for the correlation between character divergence and distributional distances.**

| Dataset                                    | Distribution | Body morphology |                 | Beak shape |                 |
|--------------------------------------------|--------------|-----------------|-----------------|------------|-----------------|
|                                            |              | <i>R</i>        | <i>P</i> -value | <i>R</i>   | <i>P</i> -value |
| 14 species                                 | Geographic   | 0.235           | 0.014 *         | 0.428      | 0.019 *         |
|                                            | Altitudinal  | 0.253           | 0.011 *         | 0.457      | 0.015 *         |
| 13 species<br>(Without <i>Ps.humilis</i> ) | Geographic   | 0.272           | 0.005 *         | 0.466      | 0.013 *         |
|                                            | Altitudinal  | 0.246           | 0.017 *         | 0.399      | 0.029 *         |

“\*” indicates statistical significance ( $P < 0.05$ ).

Figure S1

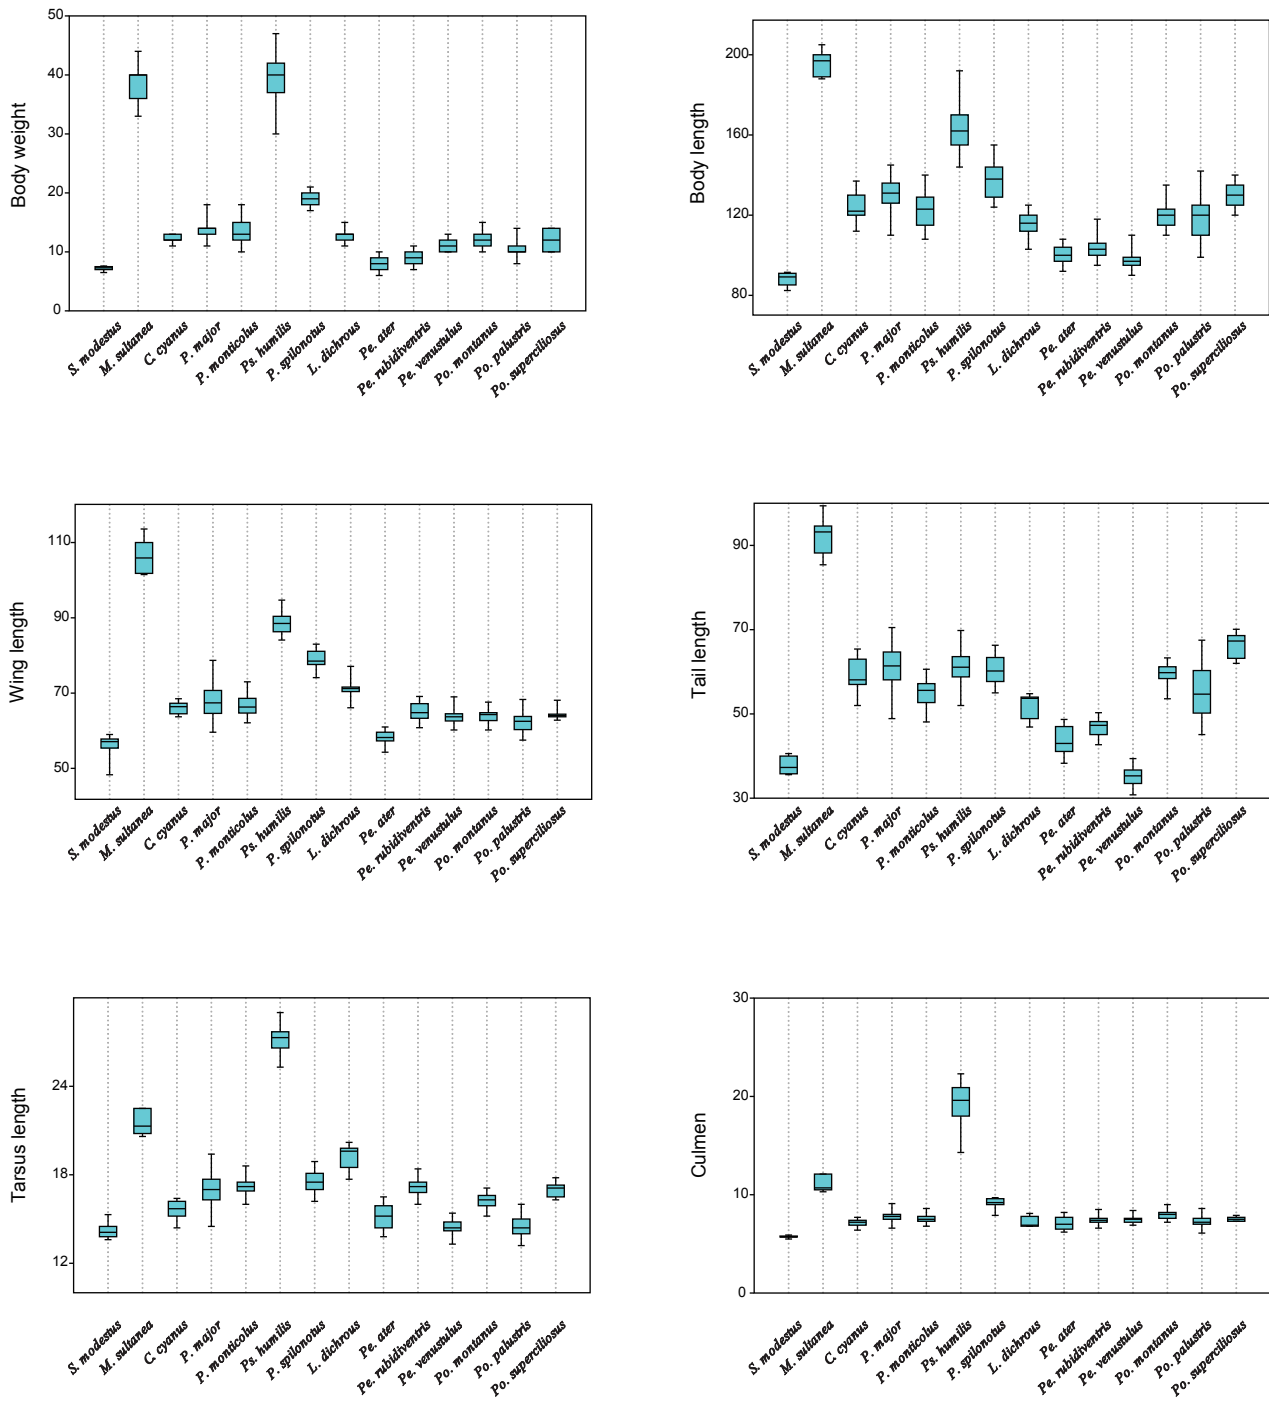

Figure S1. Box plots of body characters of the 14 Paridae species examined.

Figure S2

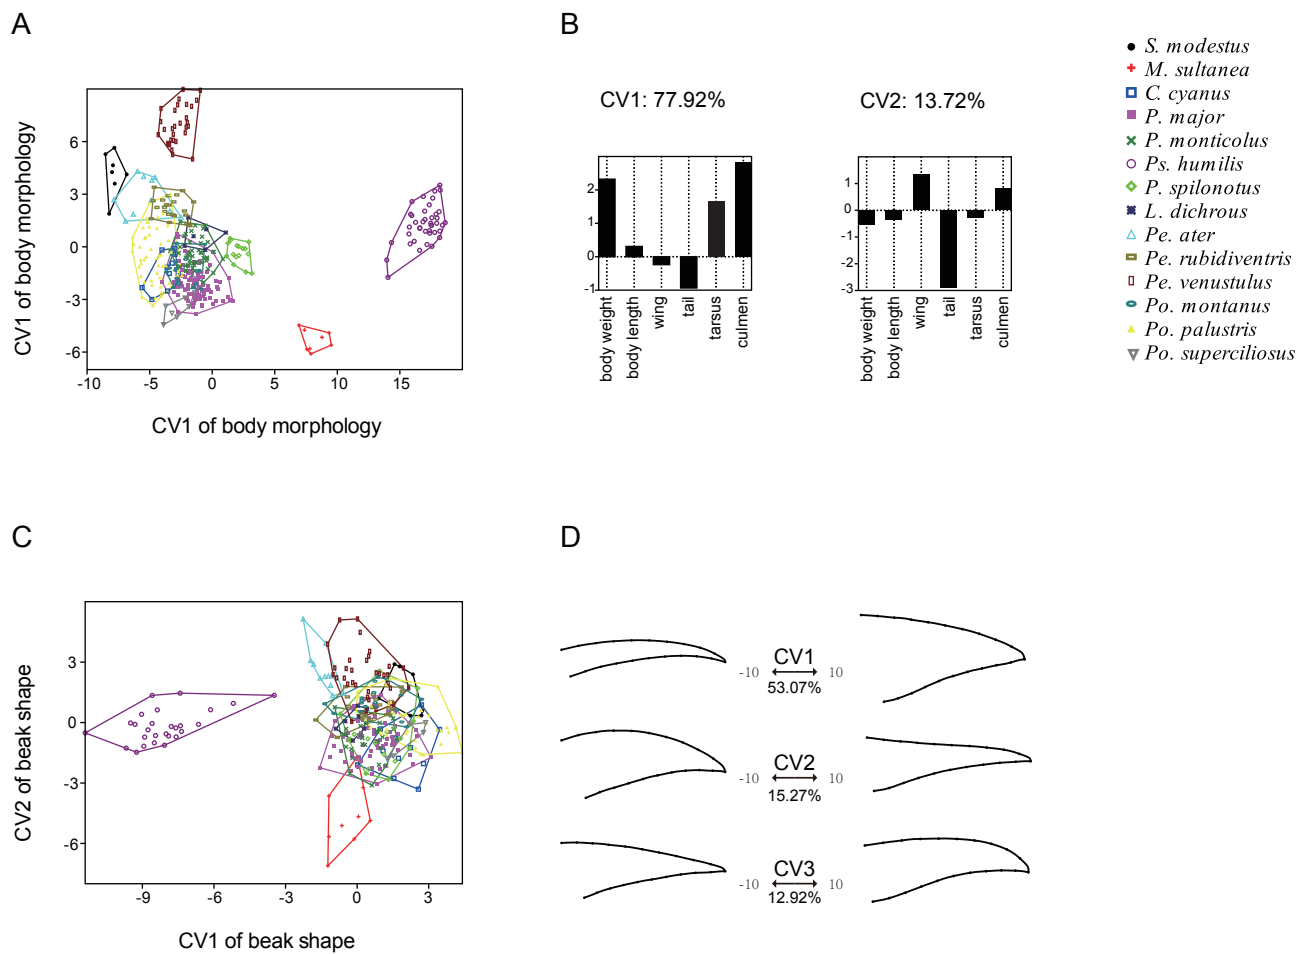

**Figure S2. Results of the canonical variate analysis (CVA) on the morphology of individuals from the 14 species examined.** The CVA was able to identify axes that concentrated most of the interspecific variation. A: Plot of CV1 and CV2 for body morphology. B: Loading coefficients of CV1 and CV2. CV1 explains 77.92 % of the total variance and is interpreted as the ratio of body weight, tarsus and culmen length to tail length. CV2 explains 13.72% of the total variance and is interpreted as the wing/tail length ratio. C: Plot of CV1 and CV2 for beak shape. CV1 explains 53.07 % of the total variance and is associated with the variation from a long, slender, pointed beak to a short, blunt, robust beak. CV2 explains 15.27 % of the total variance and is associated with beak shape variation from a straight outline to a rounded outline. CV3 explains 12.92% of the total variance and is associated with the curvature of the beak outline near the tip, as well as relative position of landmarks 1 and 2. This axis of shape variation shows the least interspecific difference.
